# Supplementary material for: Immune-Related lncRNA to Construct Novel Signature and Predict the Immune Landscape of Human Hepatocellular Carcinoma
Source: PubMed Central journal article supplement — Mol Ther Nucleic Acids. 2020 Oct 10;22:937–47. doi: 10.1016/j.omtn.2020.10.002 (PMC7670249; doi:10.1016/j.omtn.2020.10.002), 2020-10-10
Supplement: mmc1.pdf [file mmc1.pdf]

**OMTN, Volume 22**

## **Supplemental Information**

**Immune-Related lncRNA to Construct**

**Novel Signature and Predict the Immune**

**Landscape of Human Hepatocellular Carcinoma**

**Weifeng Hong, Li Liang, Yujun Gu, Zhenhua Qi, Haibo Qiu, Xiaosong Yang, Weian Zeng, Liheng Ma, and Jingdun Xie**

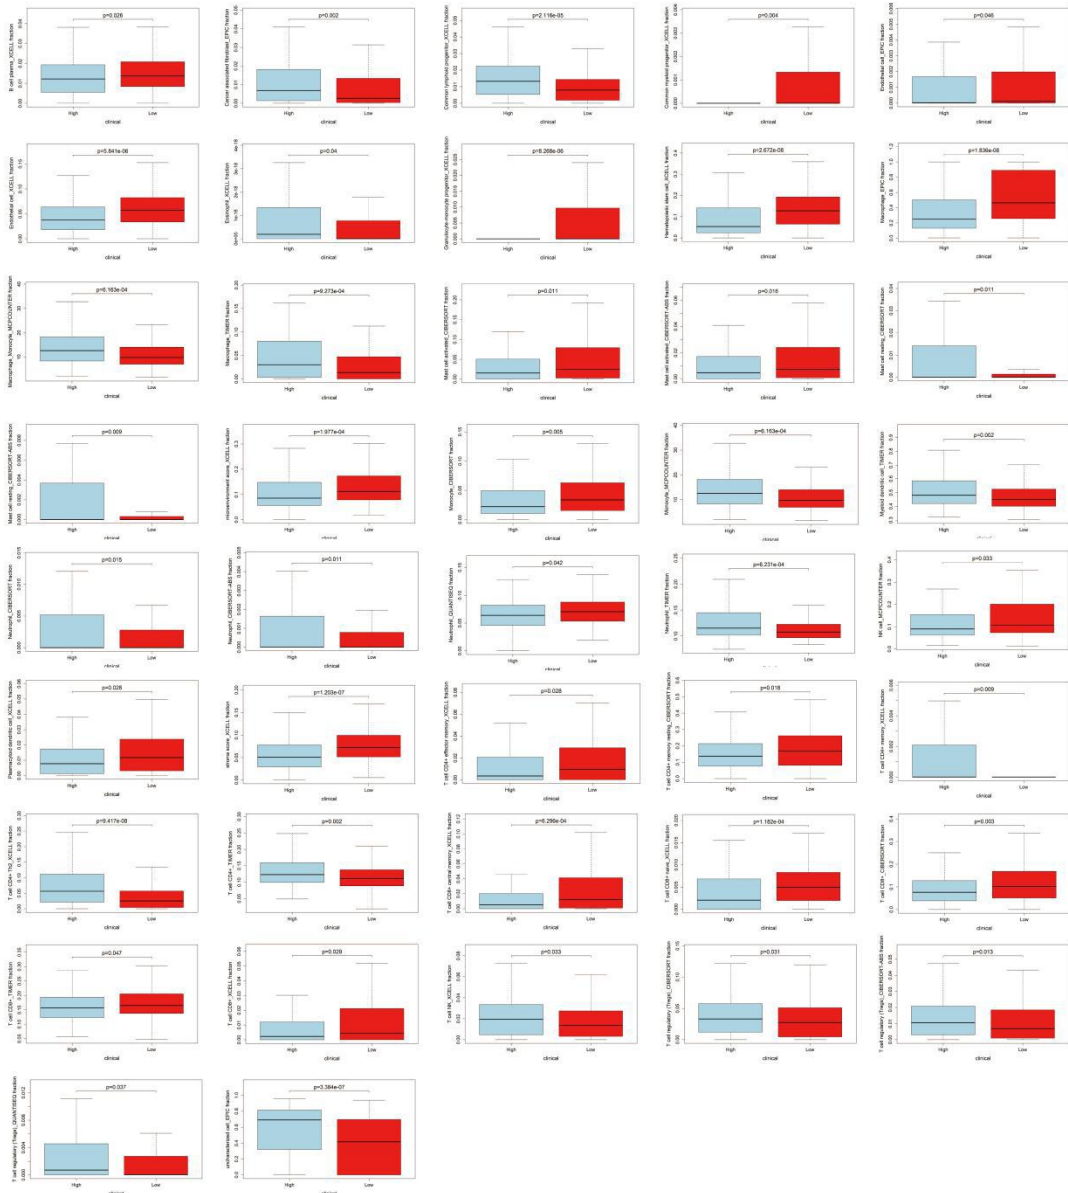

**Figure S1. The representative results of the evaluation of tumor infiltrating immune cells with risk assessment model.**

**Table S1. A total of 808 immune-related lncRNAs were identified by co-expression analysis (submitted as a separate Excel file).**

**Table S2. The detail values of univariate and multivariate cox regression analysis.**

| id        | Univariate analysis |            |       | Multivariate analysis |            |       |
|-----------|---------------------|------------|-------|-----------------------|------------|-------|
|           | HR                  | 95% CI     | P     | HR                    | 95% CI     | P     |
| age       | 1.01                | 0.99 ~1.03 | 0.211 | 1.00                  | 0.99 ~1.02 | 0.846 |
| gender    | 0.84                | 0.56 ~1.27 | 0.415 | 0.82                  | 0.53 ~1.25 | 0.353 |
| grade     | 1.11                | 0.85 ~1.45 | 0.458 | 1.28                  | 0.95 ~1.73 | 0.109 |
| BMI       | 1.00                | 0.97 ~1.03 | 0.920 | 1.01                  | 0.98 ~1.04 | 0.487 |
| stage     | 1.72                | 1.39 ~2.13 | 0.000 | 0.86                  | 0.37 ~1.99 | 0.724 |
| T         | 1.69                | 1.38 ~2.07 | 0.000 | 1.84                  | 0.83 ~4.08 | 0.136 |
| M         | 1.18                | 0.93 ~1.49 | 0.165 | 1.29                  | 0.94 ~1.75 | 0.114 |
| N         | 1.13                | 0.90 ~1.42 | 0.290 | 1.07                  | 0.78 ~1.46 | 0.683 |
| riskScore | 1.08                | 1.06 ~1.09 | 0.000 | 1.07                  | 1.06 ~1.09 | 0.000 |

**Table S3. The p value of comparing tumour infiltrating immune cells and risk score.**

| gene                                    | pVal   | gene                                           | pVal   |
|-----------------------------------------|--------|------------------------------------------------|--------|
| Macrophage_EPIC                         | 0.0000 | Myeloid dendritic cell resting_CIBERSORT-ABS   | 0.1448 |
| Hematopoietic stem cell_XCELL           | 0.0000 | B cell plasma_CIBERSORT-ABS                    | 0.1491 |
| T cell CD4+ Th2_XCELL                   | 0.0000 | B cell_TIMER                                   | 0.1576 |
| stroma score_XCELL                      | 0.0000 | T cell CD4+ central memory_XCELL               | 0.1594 |
| Macrophage M0_CIBERSORT                 | 0.0000 | Myeloid dendritic cell activated_CIBERSORT-ABS | 0.1645 |
| Macrophage M0_CIBERSORT-ABS             | 0.0000 | Myeloid dendritic cell activated_CIBERSORT     | 0.1653 |
| uncharacterized cell_EPIC               | 0.0000 | B cell_XCELL                                   | 0.1784 |
| Endothelial cell_XCELL                  | 0.0000 | NK cell_XCELL                                  | 0.1878 |
| Granulocyte-monocyte progenitor_XCELL   | 0.0000 | Endothelial cell_MCPCOUNTER                    | 0.1943 |
| Common lymphoid progenitor_XCELL        | 0.0000 | T cell CD4+ naive_XCELL                        | 0.2013 |
| T cell CD8+ naive_XCELL                 | 0.0001 | Myeloid dendritic cell resting_CIBERSORT       | 0.2080 |
| microenvironment score_XCELL            | 0.0002 | B cell plasma_CIBERSORT                        | 0.2159 |
| Monocyte_QUANTISEQ                      | 0.0002 | cytotoxicity score_MCPCOUNTER                  | 0.2217 |
| Monocyte_MCPCOUNTER                     | 0.0006 | T cell CD4+ (non-regulatory)_QUANTISEQ         | 0.2225 |
| Macrophage_Monocyte_MCPCOUNTER          | 0.0006 | Cancer associated fibroblast_XCELL             | 0.2226 |
| Neutrophil_TIMER                        | 0.0006 | Macrophage M2_CIBERSORT                        | 0.2282 |
| T cell CD8+ central memory_XCELL        | 0.0006 | Macrophage M1_XCELL                            | 0.2295 |
| Macrophage M1_QUANTISEQ                 | 0.0009 | T cell CD4+ naive_CIBERSORT                    | 0.2385 |
| Macrophage_TIMER                        | 0.0009 | T cell CD4+ naive_CIBERSORT-ABS                | 0.2418 |
| Cancer associated fibroblast_EPIC       | 0.0017 | Myeloid dendritic cell_MCPCOUNTER              | 0.2433 |
| T cell CD4+_TIMER                       | 0.0018 | Mast cell_XCELL                                | 0.2638 |
| Myeloid dendritic cell_TIMER            | 0.0022 | T cell CD8+_QUANTISEQ                          | 0.2886 |
| T cell CD8+_CIBERSORT                   | 0.0026 | T cell follicular helper_CIBERSORT             | 0.2923 |
| Common myeloid progenitor_XCELL         | 0.0036 | NK cell activated_CIBERSORT                    | 0.2931 |
| Monocyte_CIBERSORT                      | 0.0050 | Neutrophil_XCELL                               | 0.2948 |
| T cell CD4+ memory_XCELL                | 0.0091 | Class-switched memory B cell_XCELL             | 0.3058 |
| Mast cell resting_CIBERSORT-ABS         | 0.0092 | B cell naive_XCELL                             | 0.3126 |
| Mast cell resting_CIBERSORT             | 0.0109 | B cell_EPIC                                    | 0.3144 |
| Mast cell activated_CIBERSORT           | 0.0109 | T cell CD4+ Th1_XCELL                          | 0.3271 |
| Neutrophil_CIBERSORT-ABS                | 0.0110 | Myeloid dendritic cell_QUANTISEQ               | 0.3822 |
| T cell regulatory (Tregs)_CIBERSORT-ABS | 0.0130 | B cell naive_CIBERSORT                         | 0.4136 |
| Neutrophil_CIBERSORT                    | 0.0149 | T cell CD8+_MCPCOUNTER                         | 0.4202 |
| Mast cell activated_CIBERSORT-ABS       | 0.0155 | Macrophage M2_QUANTISEQ                        | 0.4722 |
| Macrophage M2_XCELL                     | 0.0161 | T cell CD8+ effector memory_XCELL              | 0.4723 |
| T cell CD4+ memory resting_CIBERSORT    | 0.0182 | NK cell activated_CIBERSORT-ABS                | 0.4736 |
| B cell plasma_XCELL                     | 0.0263 | T cell regulatory (Tregs)_XCELL                | 0.4944 |
| Plasmacytoid dendritic cell_XCELL       | 0.0279 | Macrophage M1_CIBERSORT                        | 0.4969 |
| T cell CD4+ effector memory_XCELL       | 0.0281 | Macrophage M1_CIBERSORT-ABS                    | 0.5200 |
| T cell CD8+_XCELL                       | 0.0292 | Myeloid dendritic cell_XCELL                   | 0.5488 |
| T cell regulatory (Tregs)_CIBERSORT     | 0.0313 | T cell CD4+_EPIC                               | 0.5665 |

|                                            |        |                                          |        |
|--------------------------------------------|--------|------------------------------------------|--------|
| NK cell_MCPCOUNTER                         | 0.0331 | B cell naive_CIBERSORT-ABS               | 0.6310 |
| T cell NK_XCELL                            | 0.0333 | Monocyte_XCELL                           | 0.6611 |
| T cell regulatory (Tregs)_QUANTISEQ        | 0.0375 | T cell gamma delta_CIBERSORT             | 0.7033 |
| Macrophage M2_CIBERSORT-ABS                | 0.0388 | T cell gamma delta_CIBERSORT-ABS         | 0.7143 |
| Eosinophil_XCELL                           | 0.0398 | Eosinophil_CIBERSORT                     | 0.7445 |
| Neutrophil_QUANTISEQ                       | 0.0424 | Eosinophil_CIBERSORT-ABS                 | 0.7475 |
| Endothelial cell_EPIC                      | 0.0455 | T cell CD4+ memory resting_CIBERSORT-ABS | 0.7831 |
| T cell CD4+ memory activated_CIBERSORT-ABS | 0.0460 | B cell memory_CIBERSORT                  | 0.7858 |
| T cell CD8+_TIMER                          | 0.0471 | NK cell resting_CIBERSORT                | 0.7866 |
| T cell CD4+ memory activated_CIBERSORT     | 0.0502 | Macrophage_XCELL                         | 0.7871 |
| Neutrophil_MCPCOUNTER                      | 0.0521 | Myeloid dendritic cell activated_XCELL   | 0.7963 |
| T cell follicular helper_CIBERSORT-ABS     | 0.0681 | B cell memory_XCELL                      | 0.7972 |
| Monocyte_CIBERSORT-ABS                     | 0.0910 | B cell memory_CIBERSORT-ABS              | 0.7988 |
| T cell_MCPCOUNTER                          | 0.0946 | NK cell resting_CIBERSORT-ABS            | 0.8092 |
| T cell CD8+_CIBERSORT-ABS                  | 0.1098 | immune score_XCELL                       | 0.8620 |
| B cell_QUANTISEQ                           | 0.1197 | T cell CD8+_EPIC                         | 0.9047 |
| NK cell_QUANTISEQ                          | 0.1210 | T cell gamma delta_XCELL                 | 0.9296 |
| T cell CD4+ (non-regulatory)_XCELL         | 0.1241 | NK cell_EPIC                             | 0.9377 |
| uncharacterized cell_QUANTISEQ             | 0.1294 | B cell_MCPCOUNTER                        | 0.9477 |
| Cancer associated fibroblast_MCPCOUNTER    | 0.1307 |                                          |        |

**Table S4. The detail comparison results of correlation ship between tumour infiltrating immune cells and risk score.**

| symbol                                  | type          | correlation | pValue |
|-----------------------------------------|---------------|-------------|--------|
| B cell memory_CIBERSORT                 | CIBERSORT     | 0.1407      | 0.0071 |
| Macrophage M0_CIBERSORT                 | CIBERSORT     | 0.1894      | 0.0003 |
| T cell CD4+ memory resting_CIBERSORT    | CIBERSORT     | -0.1336     | 0.0106 |
| Macrophage M0_CIBERSORT-ABS             | CIBERSORT-ABS | 0.1791      | 0.0006 |
| Macrophage M2_CIBERSORT-ABS             | CIBERSORT-ABS | 0.1665      | 0.0014 |
| Mast cell resting_CIBERSORT-ABS         | CIBERSORT-ABS | 0.1037      | 0.0476 |
| NK cell activated_CIBERSORT-ABS         | CIBERSORT-ABS | 0.1220      | 0.0197 |
| T cell follicular helper_CIBERSORT-ABS  | CIBERSORT-ABS | 0.1390      | 0.0078 |
| T cell gamma delta_CIBERSORT-ABS        | CIBERSORT-ABS | 0.1253      | 0.0166 |
| T cell regulatory (Tregs)_CIBERSORT-ABS | CIBERSORT-ABS | 0.1038      | 0.0474 |
| Macrophage_EPIC                         | EPIC          | -0.2435     | 0.0000 |
| uncharacterized cell_EPIC               | EPIC          | 0.2512      | 0.0000 |
| Macrophage_Monocyte_MCPCOUNTER          | MCPCOUNTER    | 0.2504      | 0.0000 |
| Monocyte_MCPCOUNTER                     | MCPCOUNTER    | 0.2504      | 0.0000 |
| Myeloid dendritic cell_MCPCOUNTER       | MCPCOUNTER    | 0.1739      | 0.0009 |
| T cell CD8+_MCPCOUNTER                  | MCPCOUNTER    | 0.1242      | 0.0176 |
| Macrophage M1_QUANTISEQ                 | QUANTISEQ     | 0.2009      | 0.0001 |
| Macrophage M2_QUANTISEQ                 | QUANTISEQ     | 0.1177      | 0.0245 |
| NK cell_QUANTISEQ                       | QUANTISEQ     | -0.1073     | 0.0404 |
| T cell CD8+_QUANTISEQ                   | QUANTISEQ     | 0.1132      | 0.0307 |
| uncharacterized cell_QUANTISEQ          | QUANTISEQ     | -0.1116     | 0.0331 |
| Macrophage_TIMER                        | TIMER         | 0.2517      | 0.0000 |
| Myeloid dendritic cell_TIMER            | TIMER         | 0.1790      | 0.0006 |
| Neutrophil_TIMER                        | TIMER         | 0.1954      | 0.0002 |
| Cancer associated fibroblast_XCELL      | XCELL         | -0.1034     | 0.0484 |
| Common lymphoid progenitor_XCELL        | XCELL         | 0.1763      | 0.0007 |
| Endothelial cell_XCELL                  | XCELL         | -0.1553     | 0.0029 |
| Granulocyte-monocyte progenitor_XCELL   | XCELL         | -0.1139     | 0.0295 |
| Hematopoietic stem cell_XCELL           | XCELL         | -0.2158     | 0.0000 |
| Macrophage M1_XCELL                     | XCELL         | 0.1413      | 0.0069 |
| Macrophage_XCELL                        | XCELL         | 0.1130      | 0.0309 |
| Monocyte_XCELL                          | XCELL         | 0.1296      | 0.0132 |
| stroma score_XCELL                      | XCELL         | -0.1921     | 0.0002 |
| T cell CD4+ Th2_XCELL                   | XCELL         | 0.3608      | 0.0000 |

**Table S5. The p value of comparing chemotherapeutics sensitivity and risk score.**

| Drug        | p-value  |
|-------------|----------|
| Doxorubicin | 0.026    |
| Vinblastine | 0.0043   |
| Mitomycin.C | 1.40E-09 |
| Cisplatin   | 3.60E-05 |
| Sorafenib   | 0.24     |
